# Supplementary material
Source: PubMed Central journal article supplement (PMC2242715)
Supplement: pnas_0707401105_2.pdf [file pnas_0707401105_2.pdf]

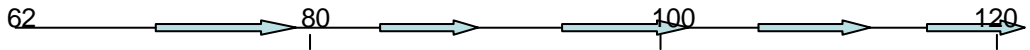

human  
 -LRSVNSREPSQVIFCNRSRVLPLVWLNFDGEPQPYPTLPPGTGRRHSYRGHLWLFRD  
 C. elegans  
 LGSSTHDNREIRVRF LNRCAYPVDVFWLNPSKQPTKYGTLAQKKYLDIKTFKDHPVARR  
 \* . . . . : \* \* \* \* . \* . \* \* \* . : \* \* \* \* . \* : : : \* \* : \*

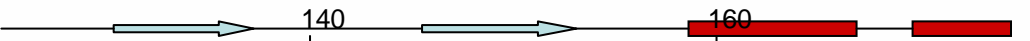

human  
 AGTHDGLLVNQTELFVPSLNVDGQPIFAN---ITLPVYTLKERCLQVVRSLVKPENYRRL  
 C. elegans  
 SFDGCKVLVNEKEVFWPEPAPRMNLIVRNHCVITMKVQSLRE---IAGRSFLRHNPTEVP  
 : : \* \* \* : \* : \* \* . : \* . \* \* \* : \* : \* \* \* . \* \* : : : : .

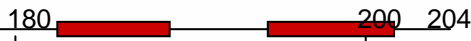

human  
 DIVRSLYEDLEDHPNVQKDLERLTQE  
 C. elegans  
 NKIKGLPRELQFEVKHFLDRKQEYSE  
 : : : \* . : \* : . : \* : : . \*
