# Supplementary material
Source: PubMed Central journal article supplement (PMC2242715)

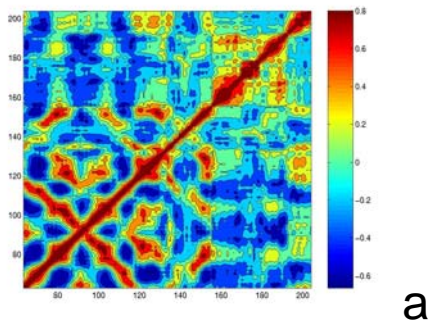

bound VHL

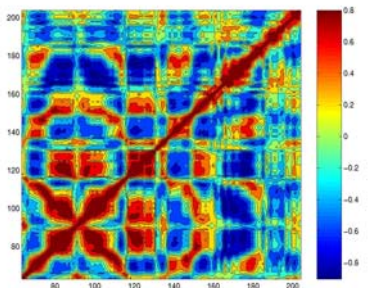

Unbound VHL

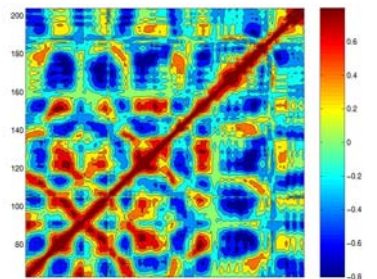

g123f

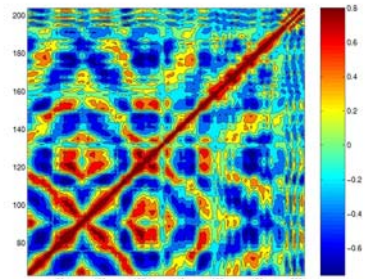

d179n

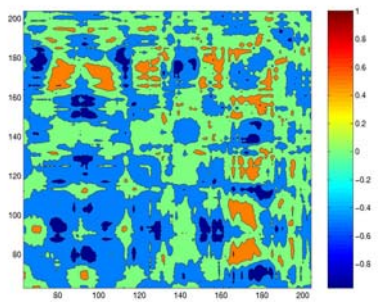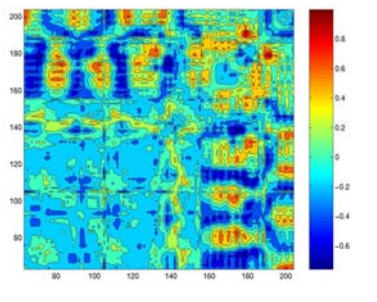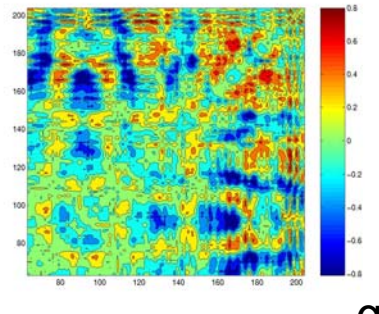

Supplement: pnas_0707401105_3.pdf [file pnas_0707401105_3.pdf]

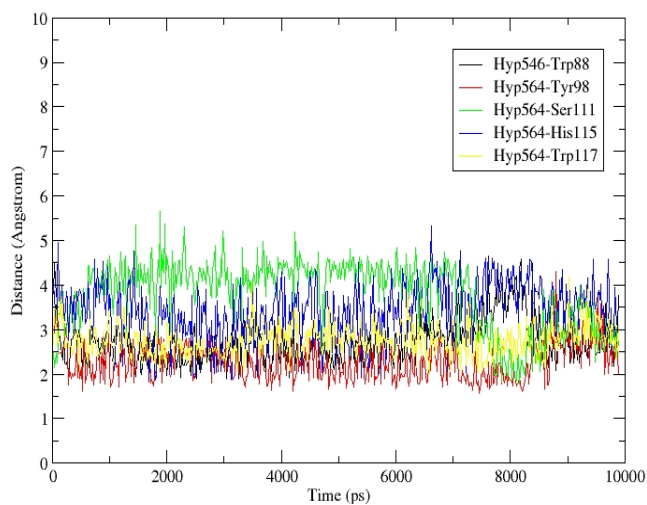

**a**

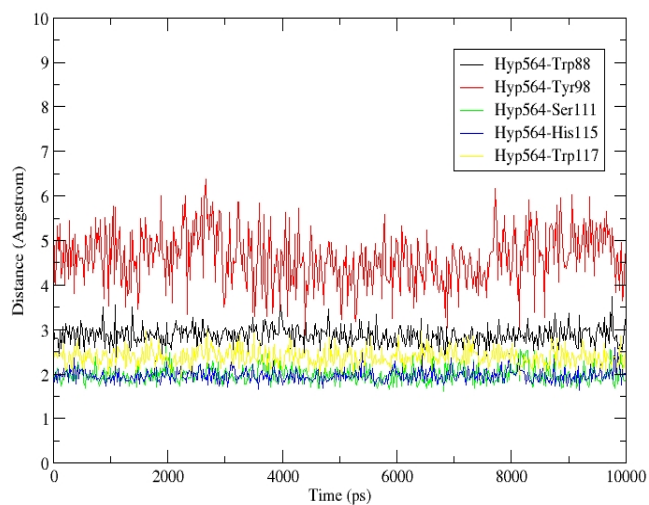

**b**

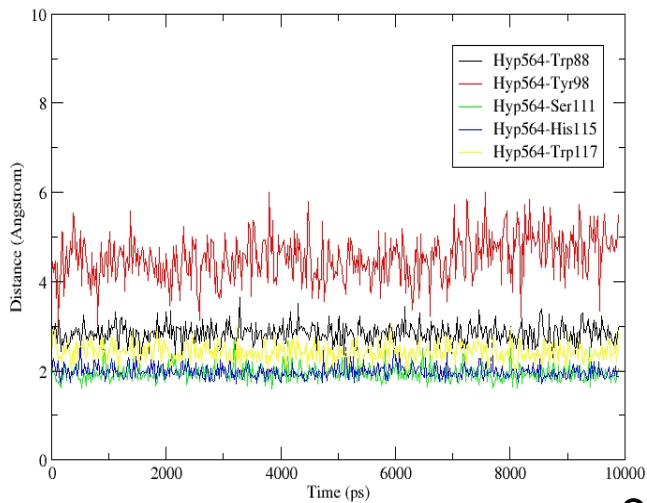

**c**

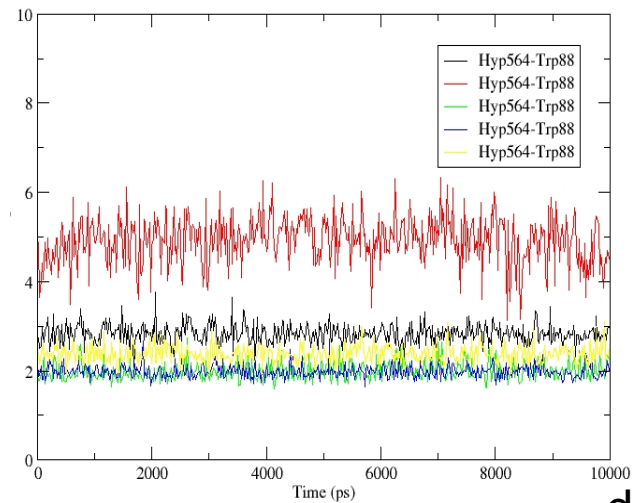

**d**

Supplement: pnas_0707401105_5.pdf [file pnas_0707401105_5.pdf]

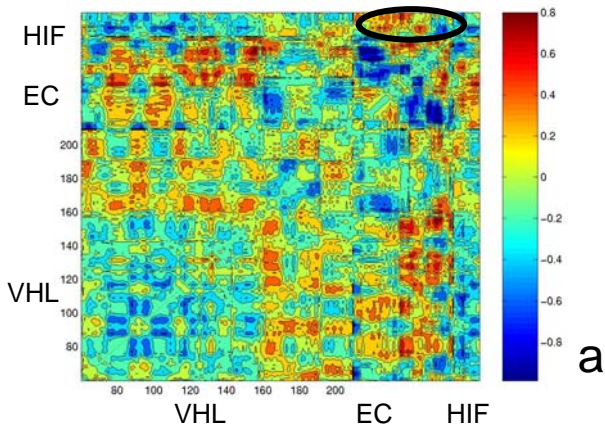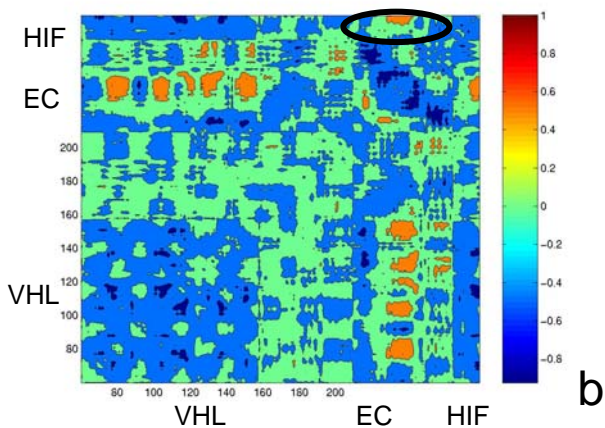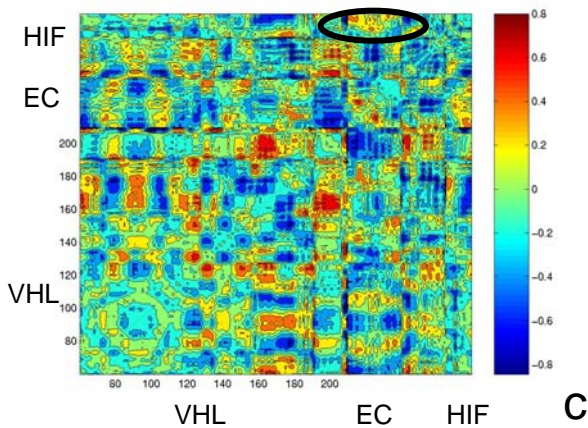

Supplement: pnas_0707401105_6.pdf [file pnas_0707401105_6.pdf]

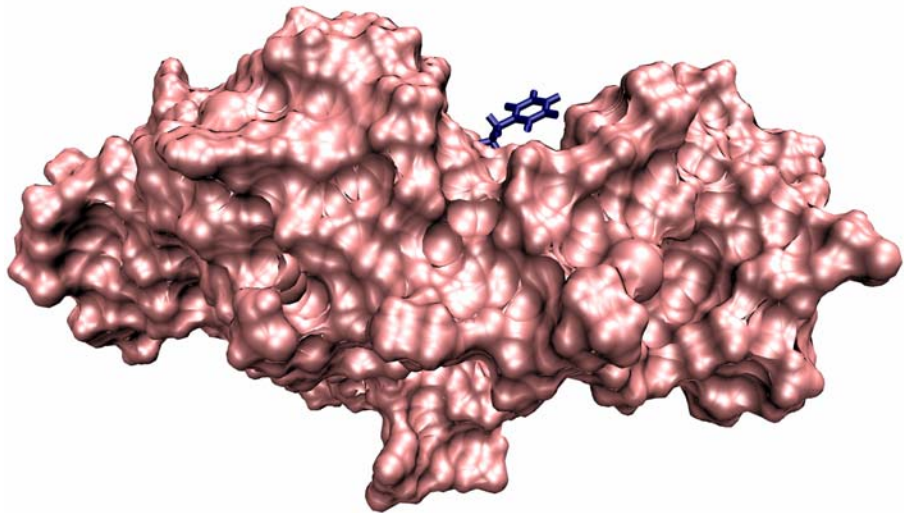

**a**

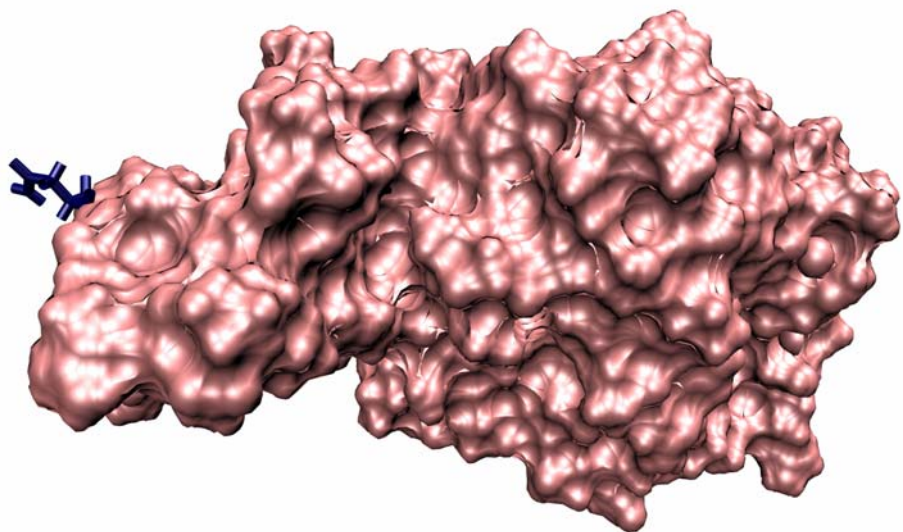

**b**

Supplement: pnas_0707401105_7.pdf [file pnas_0707401105_7.pdf]
